# Supplementary material
Source: Springer Nature journal article supplement (https://www.springermedizin.de/resource/supplementary/12875_2010_512_MOESM4_ESM.pdf/9434768)
Supplement: MOESM4 [file 9434768]

**An optimal target BP after stroke is 130/80 mmHg**

**Achieving this target BP can reduce the risk of recurrent strokes and other cardiovascular events by 28% or more. PROGRESS Collaborative Group (2001)**

**Prescribing two or three antihypertensive drugs at standard dose may reduce risk of cardiovascular events by up to 50%. Law (2009)**

**Intercollegiate Stroke Working Party Guidelines (2008), section 5.4, page 66**
